# Supplementary material
Source: MDPI journal article supplement (https://www.mdpi.com/1999-4907/6/4/859)
Supplement: s1 [file s1]

Supplementary Materials

**Table S1.** Tree species included in Sim4Tree v2.5, either with specific yield tables or linked to the yield tables of another species.

| **Tree Species with Own Yield Table** | **Tree Species Linked to Yield Table** |
| --- | --- |
| Ash (*Fraxinus excelsior*) | Elm (*Ulmus* spp.) |
| Field maple (*Acer campestre*) |
| Sycamore (*Acer pseudoplatanus*) |
| Austrian pine (*Pinus nigra* var*. austriaca*) | - |
| Beech (*Fagus sylvatica*) | - |
| Birch (*Betula pendula* & *Betula pubescens*) | - |
| Common alder (*Alnus glutinosa*) | Grey alder (*Alnus incana*) |
| Corsican pine (*Pinus nigra* var*. maritima*) | - |
| Douglas fir (*Pseudotsuga menziesii*) | Silver fir (*Abies alba*) |
| Larch (*Larix kaempferi* and *Larix decidua*) | - |
| Norway spruce (*Picea abies*) | - |
| Pedunculate oak (*Quercus robur*) | Sessile oak (*Quercus petraea*) |
| Poplar, hybrid (*Populus euramericana*) | Willow (*Salix* spp.) |
| Aspen (*Populus tremula*) |
| Grey poplar (*Populus canescens*) |
| Red oak (*Quercus rubra*) | - |
| Scots pine (*Pinus sylvestris*) | - |

**Table S2.** Sim4Tree scenario parameters in the Bosland case study.

| ***Scenario parameter*** | **Selected choice in the Bosland case study** |
| --- | --- |
| ***Decision level*** | N2 |
| ***Model*** | Yield tables |
| ***Simulation period*** | 2010–2070 |
| ***Climate scenario*** | Baseline (no climate change) |
| ***Land use types*** | High forest (productive + non-productive), forest gaps, water |
| ***Silvicultural regime*** | Thinning from below |
| ***Timing of final cut*** | Fixed at default age and gradual conversion |
| ***Regeneration*** | Regeneration to a set of species |
| ***Practical planning*** | No limitation of the overall annual area of final cuts |
| ***Cost-benefit analysis*** | Not applicable |

**Table S3.** Optimization criteria and weights for the Bosland case study, along with the simulated values for 3 different management scenarios and their rank in the iterative ideal point thresholding (IIPT) optimization. Optimal values are indicated in green. Criteria and weights were chosen by the stakeholder committee.

| **Criterion** | **Measurable Ecosystem Service** | **Unit** | **Evaluation Period** | **Weight in MCDA** | **Target** | **Illustrative Scenario Values** | | |
| --- | --- | --- | --- | --- | --- | --- | --- | --- |
| **Scenario 322** | **Scenario 112** | **Scenario 412** |
| Maintenance of growing stock | Standing volume of hardwood | M3/ha | Final time step | 0.041 | Maximize | 28 | 45 | 27 |
| Standing volume of softwood | m3/ha | 0.054 | 104 | 87 | 100 |
| Maintenance of annual harvests (thinnings + clearcut) | Harvested volume of hardwood | m3 | 0.045 | 10,214 | 14,319 | 9176 |
| Harvested volume of softwood | m3 | 0.051 | 112,565 | 100,757 | 110,133 |
| Fraction of the area  containing valuable species | Area native hardwood | Ha | 0.057 | 524 | 760 | 604 |
| Area Douglas fir and larch | Ha | 0.064 | 168 | 71 | 168 |
| Fraction of thick trees | Fraction of trees in largest diameter class | % | 0.054 | 17 | 17 | 18 |
| Evenness of the area distribution between the different species | Shannon evenness index | - | 0.054 | 0.56 | 0.52 | 0.59 |
| Evenness of the age distribution | Deviation from the mean | - | 0.070 | Minimize | 120 | 131 | 120 |
| Maximized production | Produced volume of hardwood | 103 m3 | Cumulative over the simulation period | 0.086 | Maximize | 26 | 41 | 23 |
| Produced volume of softwood | 103 m3 | 0.086 | 1036 | 1003 | 1032 |
| Produced volume of Douglas fir and larch | 103 m3 | 0.113 | 13 | 10 | 15 |
| Avoiding harvest fluctuations | Deviation from the mean | - | 0.113 | Minimize | 3.3 | 3.6 | 3.3 |
| Ensuring presence of clearcut areas | Deviation from the mean | - | 0.093 | 2.5 | 2.6 | 2.5 |
|  |  |  |  |  |  | Rank **64** in IIPT | Rank **77** in IIPT | Rank **100** in IIPT |

**Table S4.** Results of the sensitivity analysis for the 5 highest ranked scenarios. By varying the criteria weights, the frequency by which a scenario is ranked first, second, up to tenth, is calculated. The total score is the sum of these frequencies, each divided by their corresponding rank.

| **Scenario** | **Ranked as Most Optimal (% of Total)** | **Ranked as Second Most Optimal (% of Total)** | **Ranked as Third Most Optimal (% of Total)** | **Total Score** |
| --- | --- | --- | --- | --- |
| 411 | 48 | 12 | 7 | 61 |
| 412 | 5 | 9 | 9 | 23 |
| 112 | 1 | 4 | 8 | 21 |
| 122 | 0 | 2 | 5 | 19 |
| 221 | 1 | 5 | 6 | 17 |

**
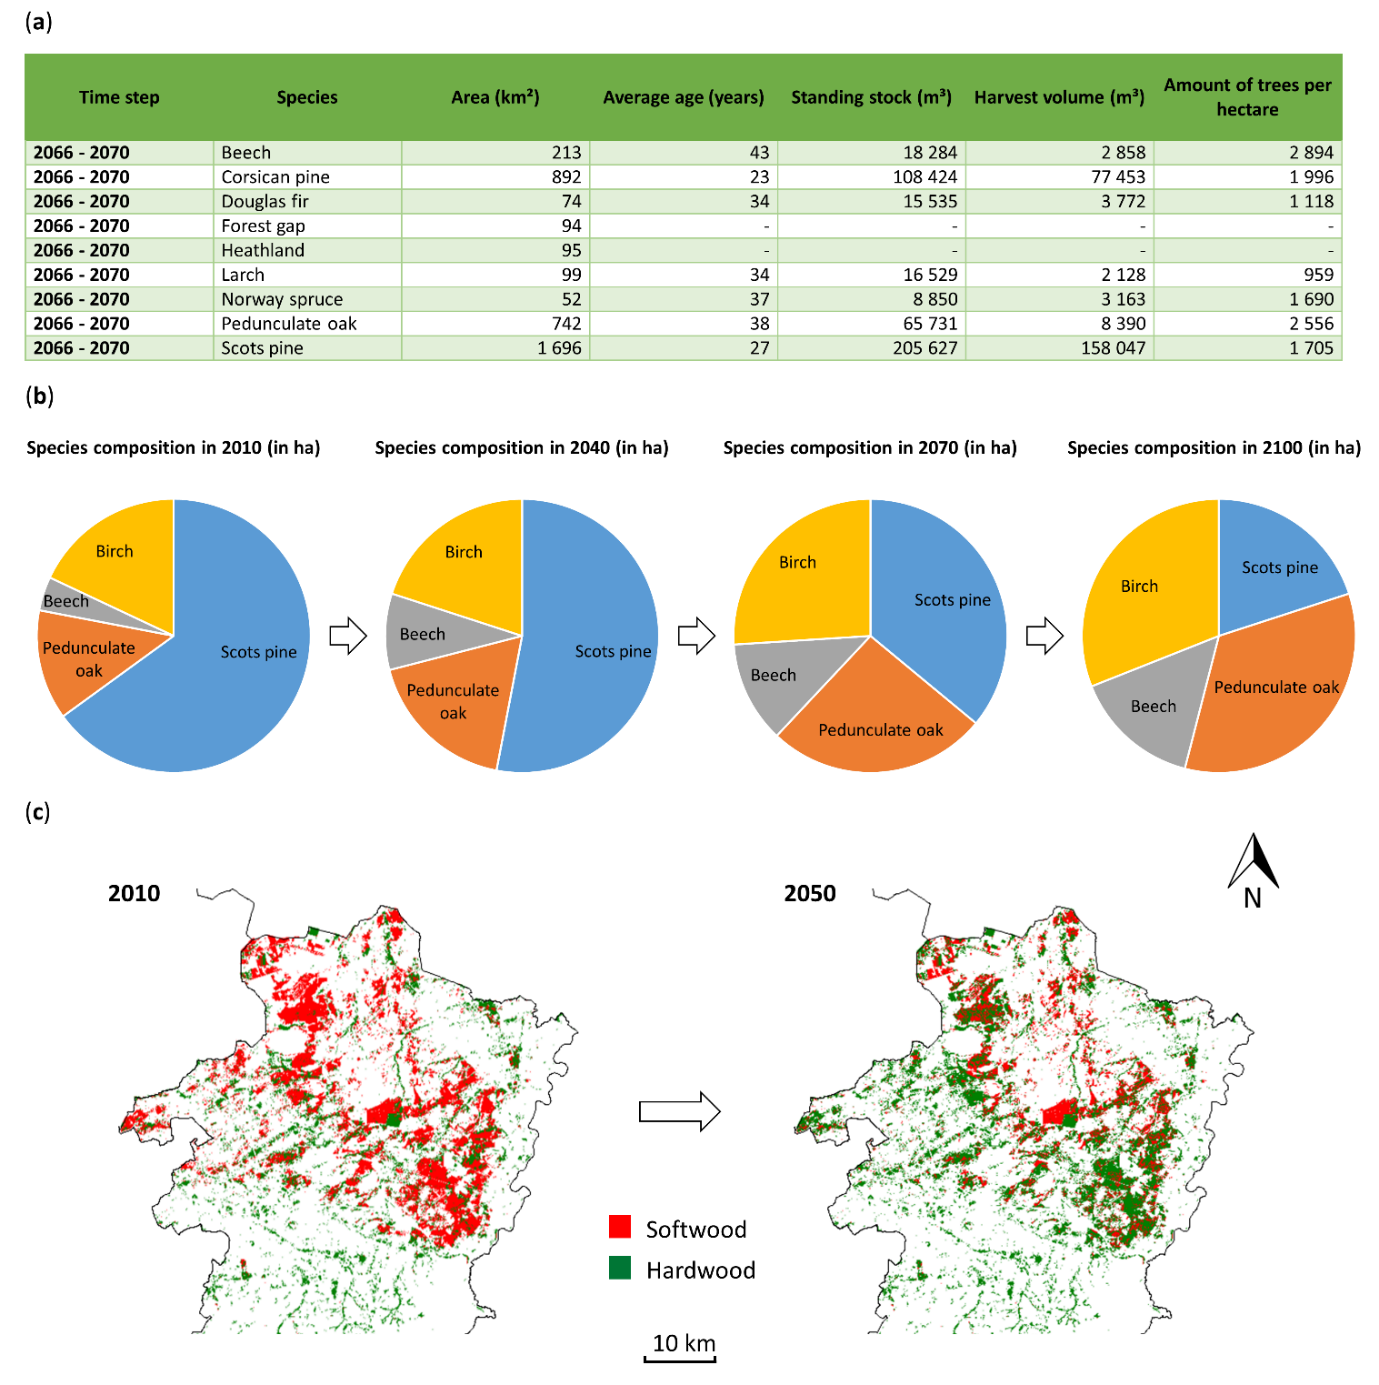
Figure S1.** Example of a tabular output (**a**), graphical output (**b**) and map output (**c**).


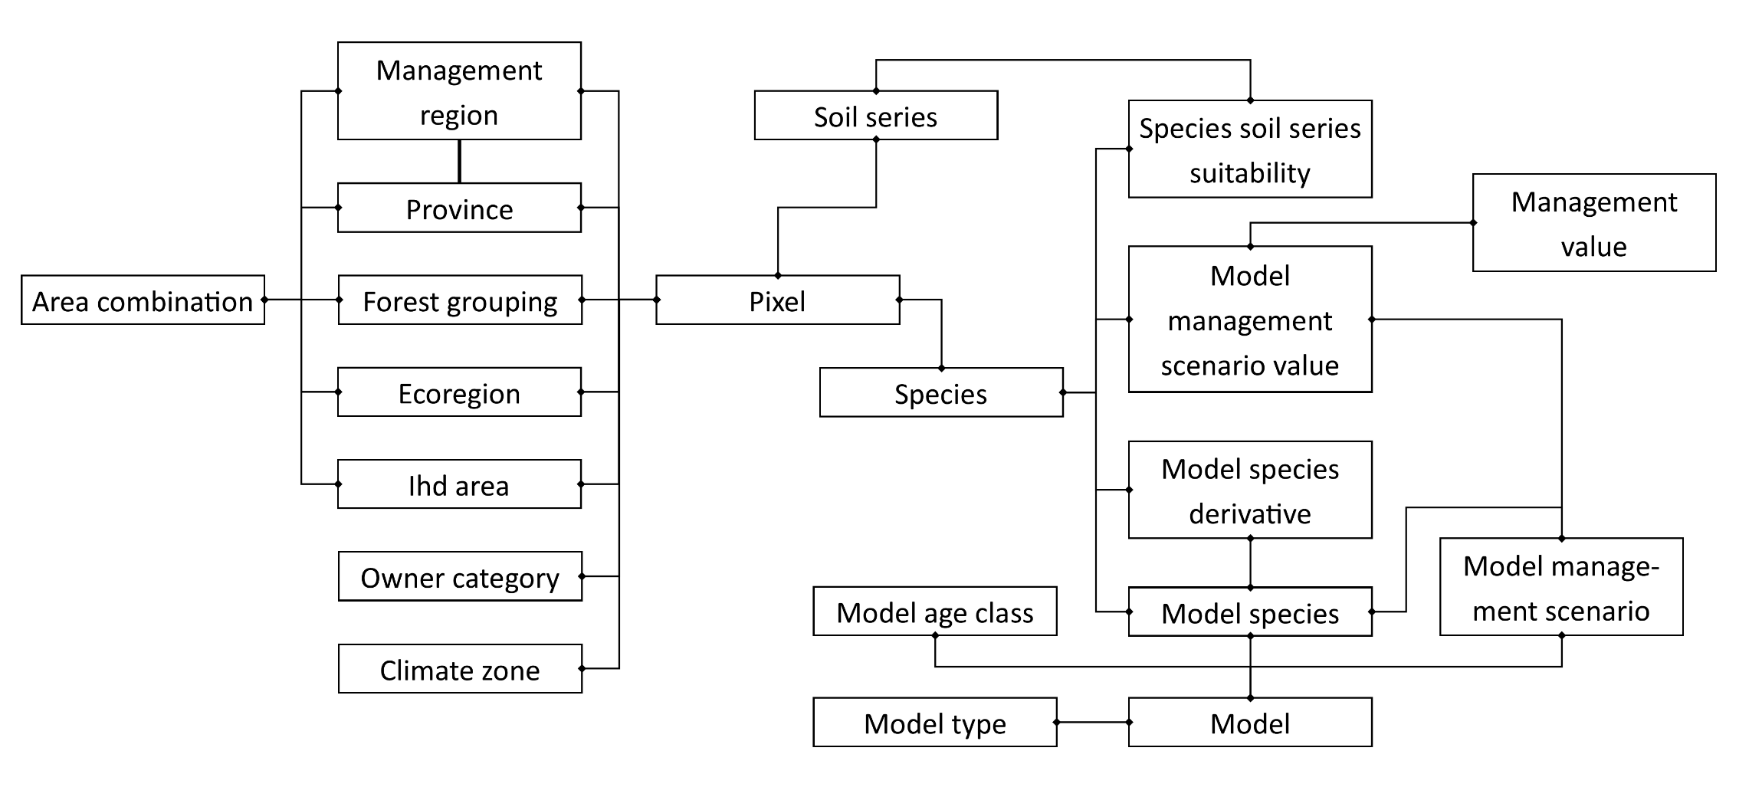


**Figure S2.** Excerpt from the relational database management system (RDBMS).


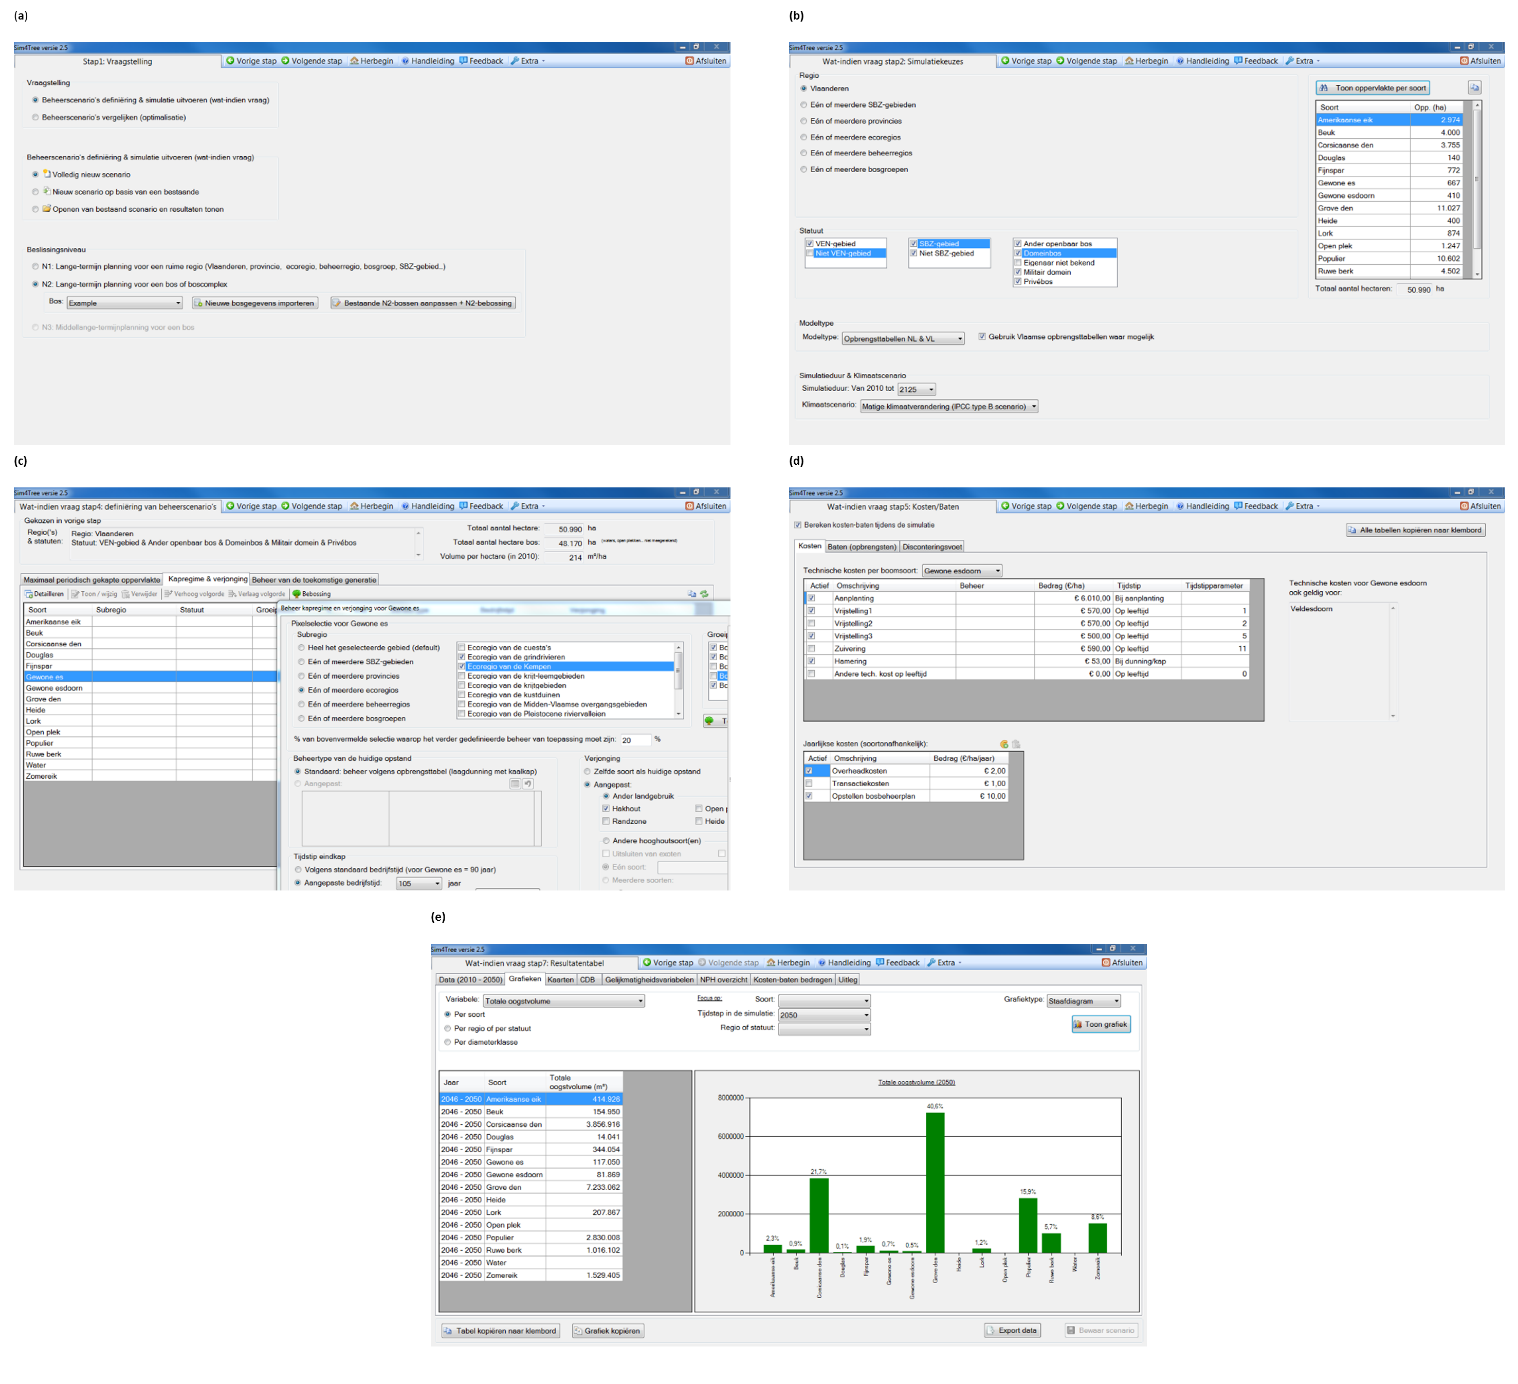


**Figure S3.** *Cont.*


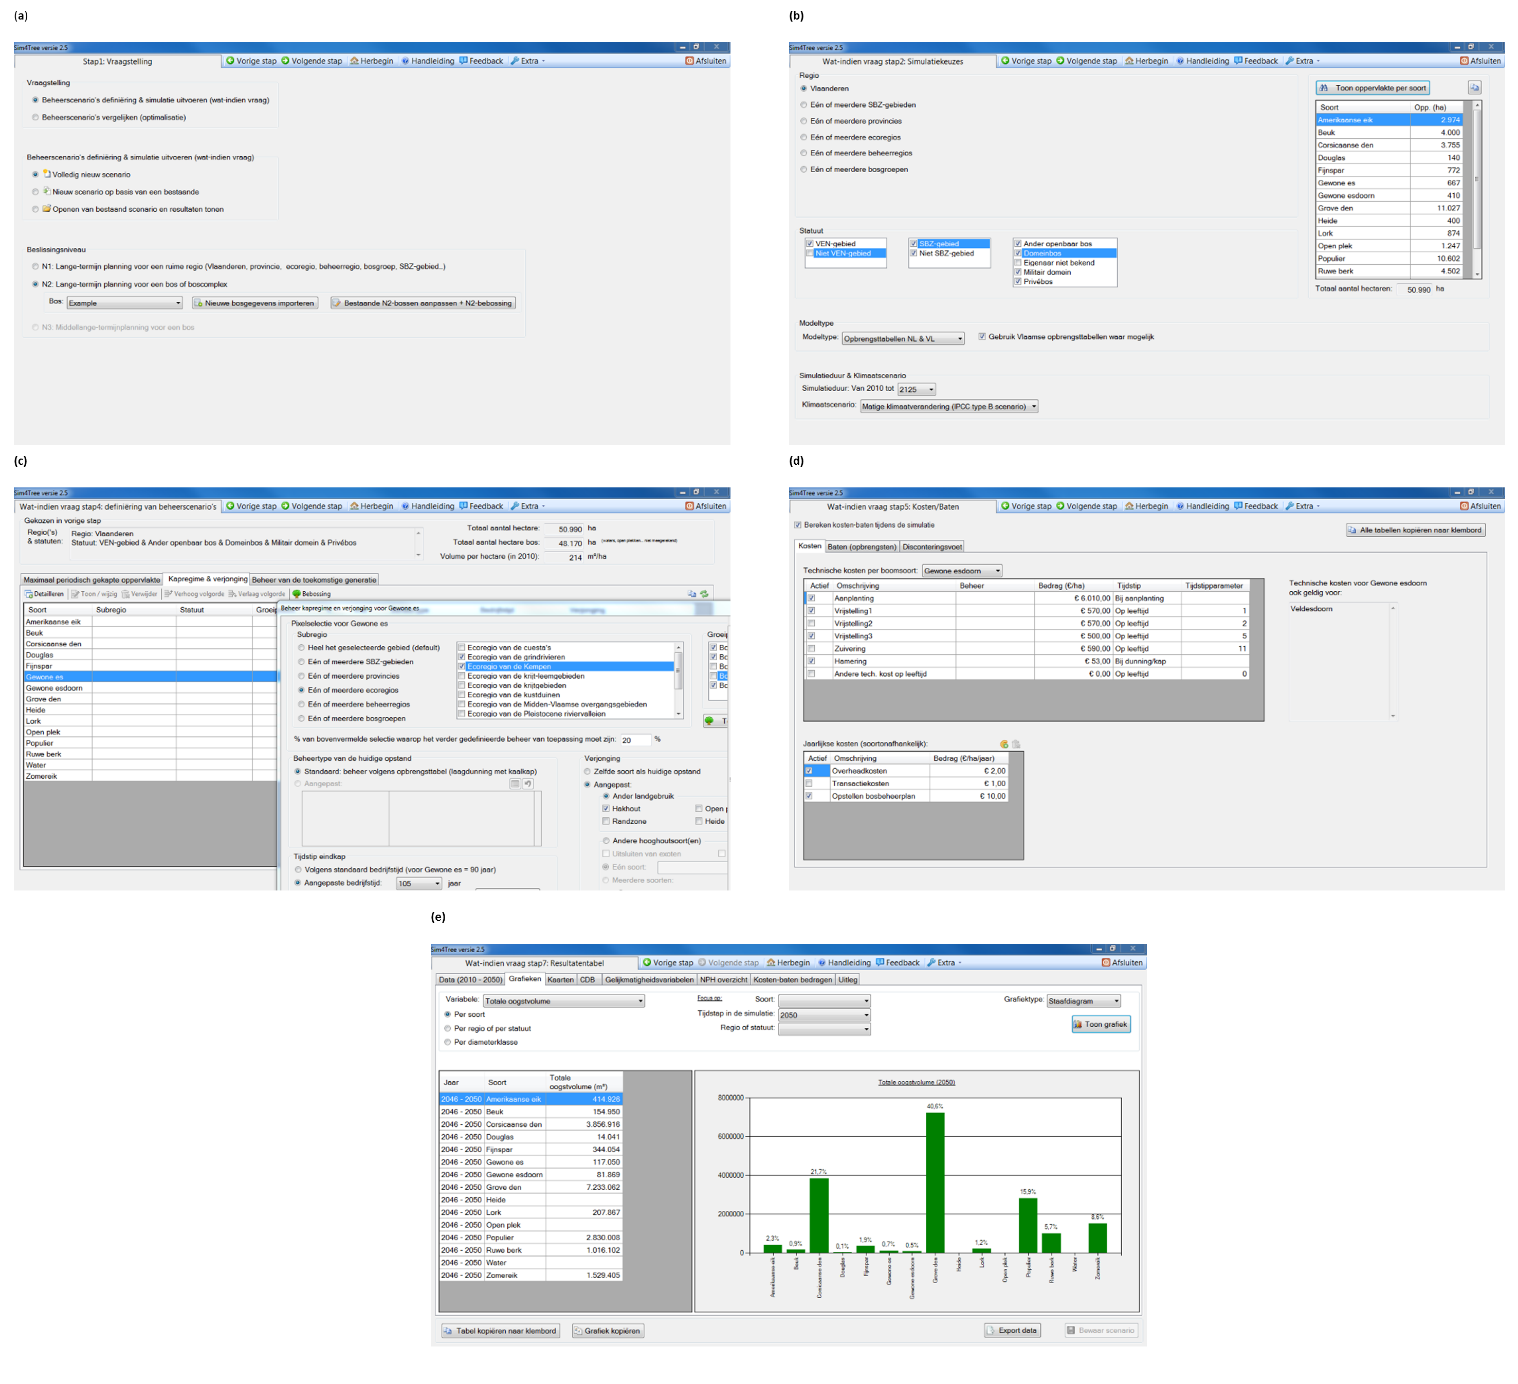


**Figure S3.** Graphical user interface. (**a**) Step 1: initialization; selection of question type and decision type; (**b**) Step 2: initialization; selection of model, simulation period and climate change scenario; (**c**) Step 3: definition of management scenario; (**d**) Step 4: definition of cost-benefit structure; (**e**) Step 5: results.


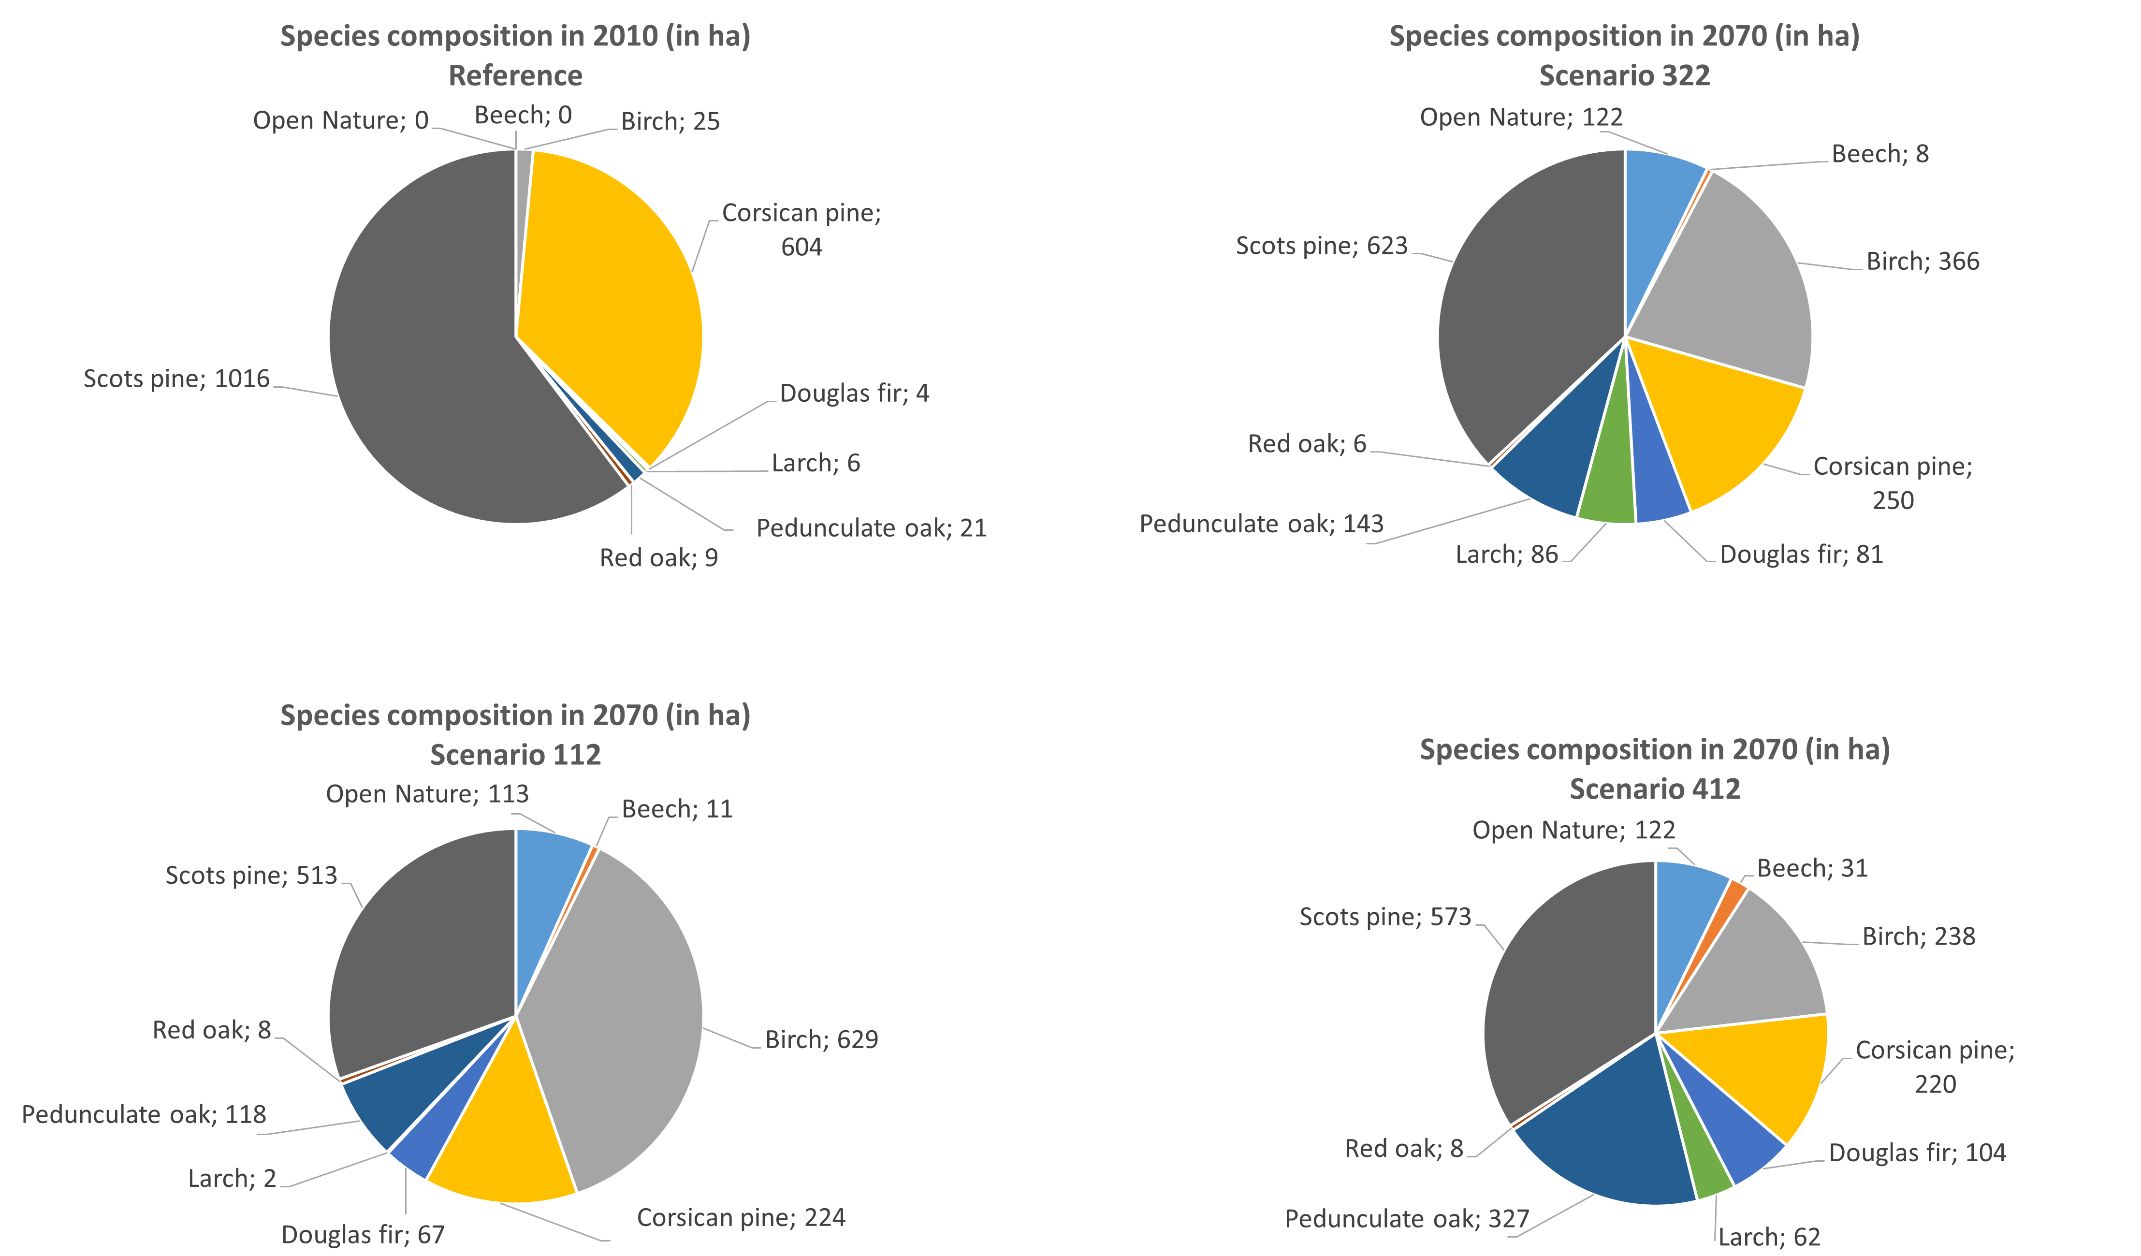


**Figure S4.** Evolution of tree species composition in Bosland from 2010 (**a**) to 2070 (**b**,**c**,**d**) (total area = 1685 ha), according to three different management scenarios.


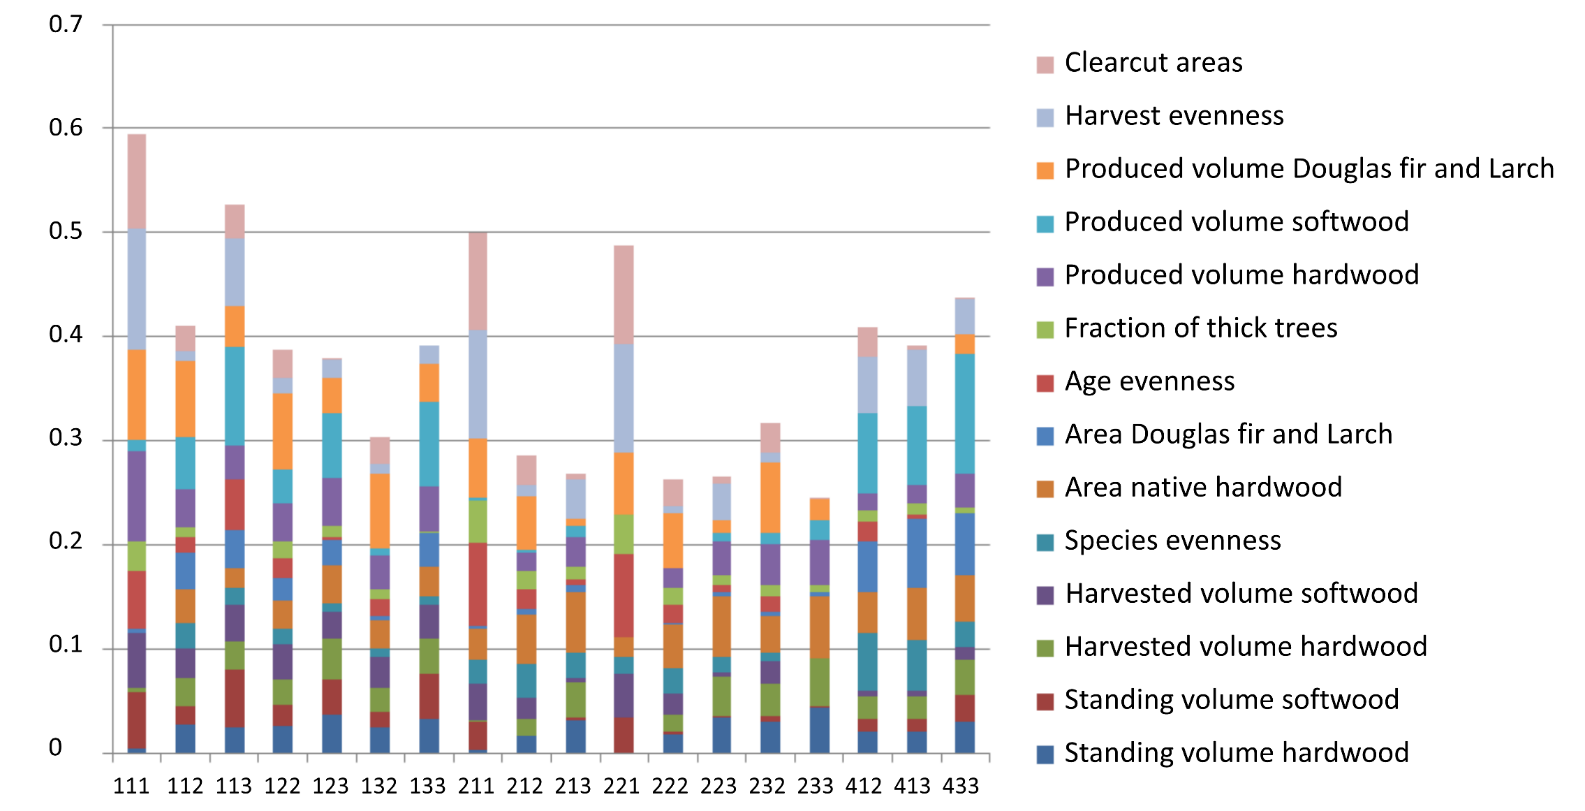


**Figure S5.** Result of the Web-Hipre multi-criteria decision analysis (MCDA) of the simulated scenarios, complied with the forest legislation. The length of each bar represents the weighted score for the corresponding criterion.

© 2015 by the authors; licensee MDPI, Basel, Switzerland. This article is an open access article distributed under the terms and conditions of the Creative Commons Attribution license (http://creativecommons.org/licenses/by/4.0/).
